# Supplementary material for: Stunting in infancy, pubertal trajectories and adult body composition: the Birth to Twenty Plus cohort, South Africa
Source: PubMed Central journal article supplement (PMC7817521; doi:10.1038/s41430-020-00716-1), 2020-08-14

## Supplementary figures

### Stunting in infancy, pubertal trajectories and adult body composition: Birth to Twenty Plus cohort, South Africa

**Figure S1**

a) BMI trajectories in girls. BMI latent classes plotted together with Extended International Obesity Task Force (IOTF) Cut-Offs for BMI in girls.

b) BMI trajectories in girls. BMI latent classes plotted together with Extended International Obesity Task Force (IOTF) Cut-Offs for BMI in girls. (Original source: Munthali et al., 2016)

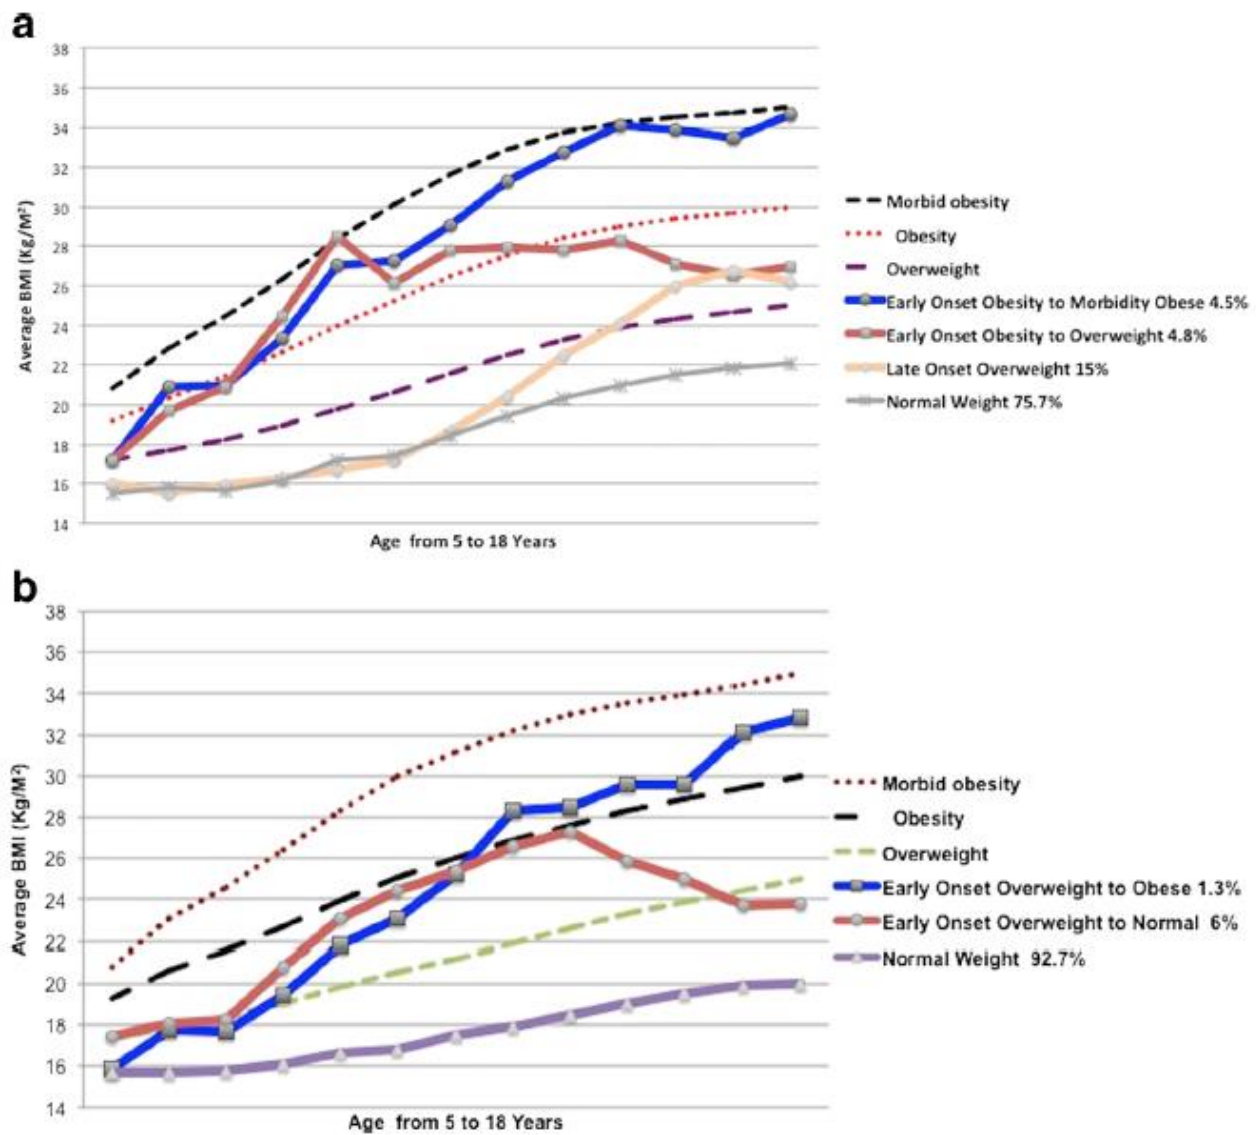

### Figure S2

Mean Tanner scores for female (n=1135) and male (n=1060) pubertal development from 9 to 16 y of age by growth trajectory class and age, Bt20 study. Pubic hair, girls (A); breasts, girls (B); pubic hair, boys (C); and genitals, boys (D). (Original source: Lundeen et al., 2016)

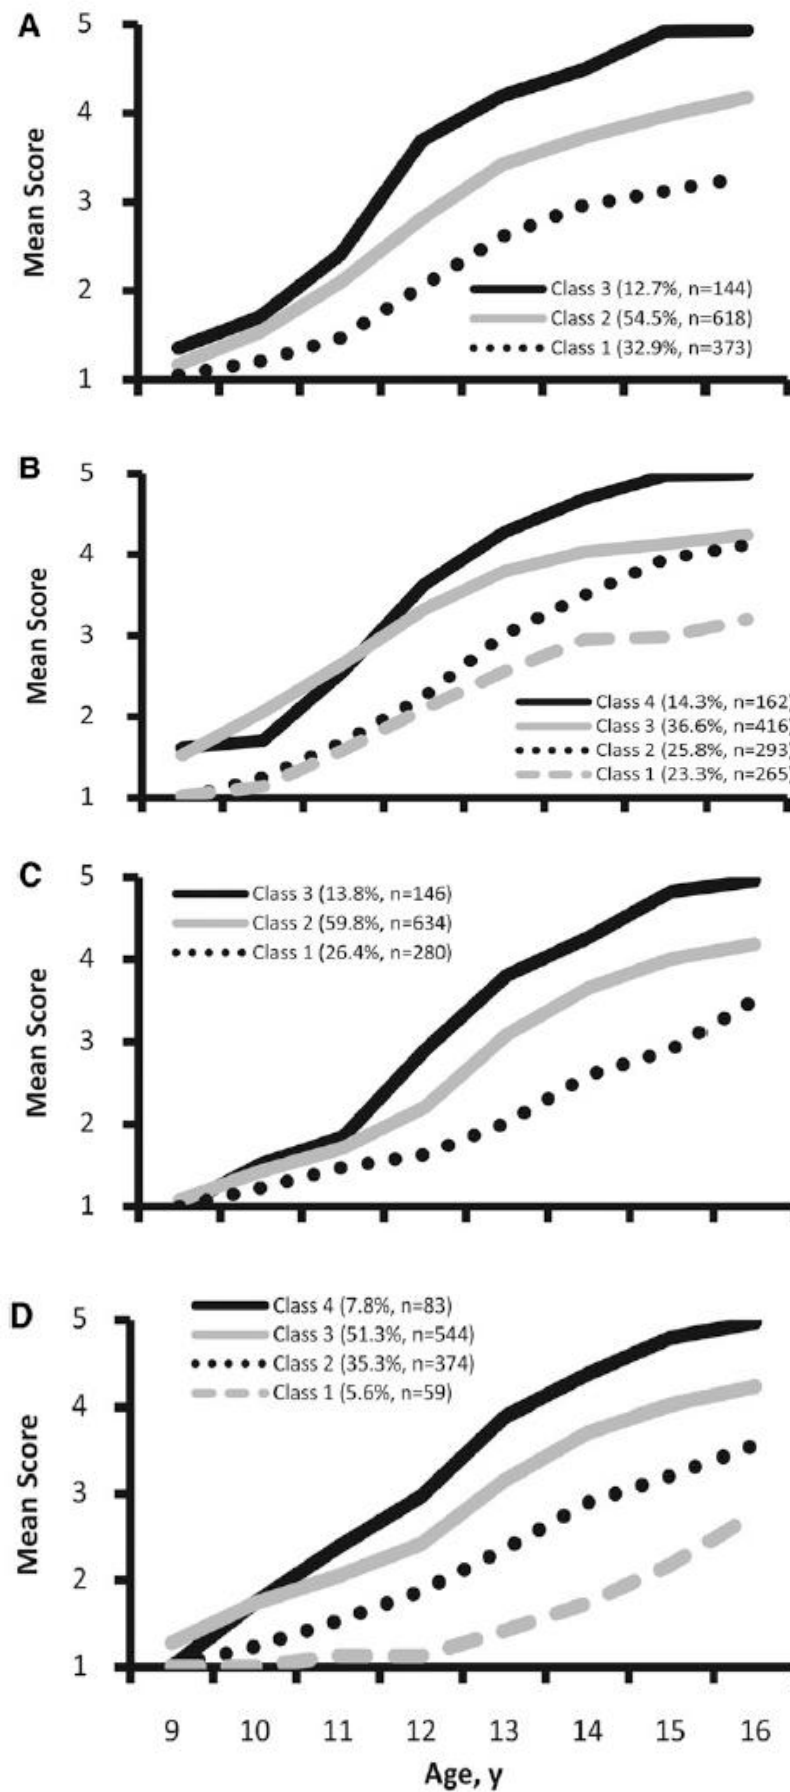

Supplement: 41430_2020_716_MOESM1_ESM.pdf [file 41430_2020_716_MOESM1_ESM.pdf]
